# Supplementary material for: Photomagnetic studies on spin-crossover solid solutions containing two different metal complexes, [Fe(1-bpp)2]x[M(terpy)2]1−x[BF4]2 (M = Ru or Co)
Source: Royal Society of Chemistry journal article supplement (doi:10.1039/c2dt12122k), 2012-01-01
Supplement: c2dt12122k.pdf [file c2dt12122k.pdf]

# Photomagnetic Studies on Spin-Crossover Solid Solutions Containing Two Different Metal Complexes, $[\text{Fe}(\text{1-bpp})_2]_x[\text{M}(\text{terpy})_2]_{1-x}[\text{BF}_4]_2$ ( $\text{M} = \text{Ru}$ or $\text{Co}$ )

Guillaume Chastanet<sup>a</sup>, Clare A. Tovee<sup>b</sup>, Geoffrey Hyett<sup>b</sup>, Malcolm A. Halcrow<sup>b</sup>  
and Jean-François Létard<sup>a,\*</sup>

<sup>a</sup>CNRS, Université Bordeaux, ICMCB, Groupe des Sciences Moléculaires,  
87 Av. Doc. A. Schweitzer, F-33608 Pessac, France.  
Email: letard@icmcb-bordeaux.cnrs.fr

<sup>b</sup>School of Chemistry, University of Leeds, Woodhouse Lane, Leeds LS2 9JT, UK.  
E-mail: m.a.halcrow@leeds.ac.uk

## Electronic Supplementary Information

**Figure S1** Observed (black) and simulated (red) powder X-ray diffraction patterns for  $[\text{Fe}(\text{1-bpp})_2]_x[\text{Ru}(\text{terpy})_2]_{1-x}[\text{BF}_4]_2$  (**1-6**).

**Figure S2** Observed (black) and simulated (red) powder X-ray diffraction patterns for  $[\text{Fe}(\text{1-bpp})_2]_x[\text{Co}(\text{terpy})_2]_{1-x}[\text{BF}_4]_2$  (**1** and **7-9**).

**Table S1** Unit cell dimensions of  $[\text{Fe}(\text{1-bpp})_2]_x[\text{Ru}(\text{terpy})_2]_{1-x}[\text{BF}_4]_2$  (**1-6**) from powder diffraction simulations.

**Table S2** Unit cell dimensions of  $[\text{Fe}(\text{1-bpp})_2]_x[\text{Co}(\text{terpy})_2]_{1-x}[\text{BF}_4]_2$  (**7-9**) from powder diffraction simulations.

**Figure S3** Variation of the unit cell volume  $V$  with composition for  $[\text{Fe}(\text{1-bpp})_2]_x[\text{M}(\text{terpy})_2]_{1-x}[\text{BF}_4]_2$ .

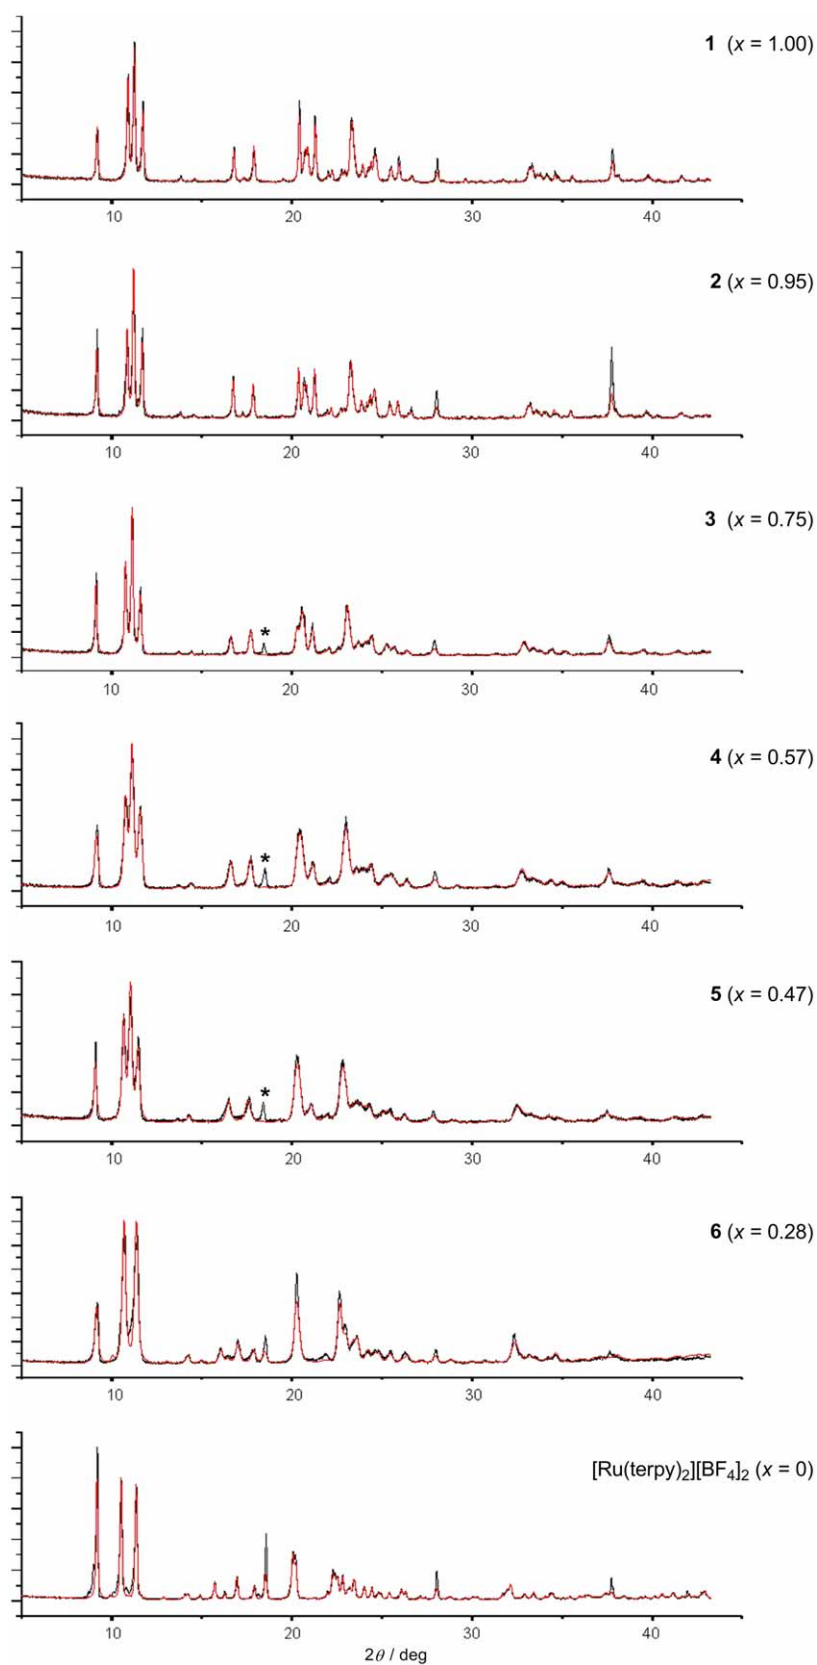

**Fig. S1** Observed (black) and simulated (red) powder X-ray diffraction patterns for [Fe(1-bpp)<sub>2</sub>]<sub>x</sub>[Ru(terpy)<sub>2</sub>]<sub>1-x</sub>[BF<sub>4</sub>]<sub>2</sub> (**1-6**). The starred peak for  $0.75 \geq x \geq 0.47$  indicates the presence of the *Cc* phase as a minority contaminant, in the *P2*<sub>1</sub> phase adopted by the bulk of these materials.

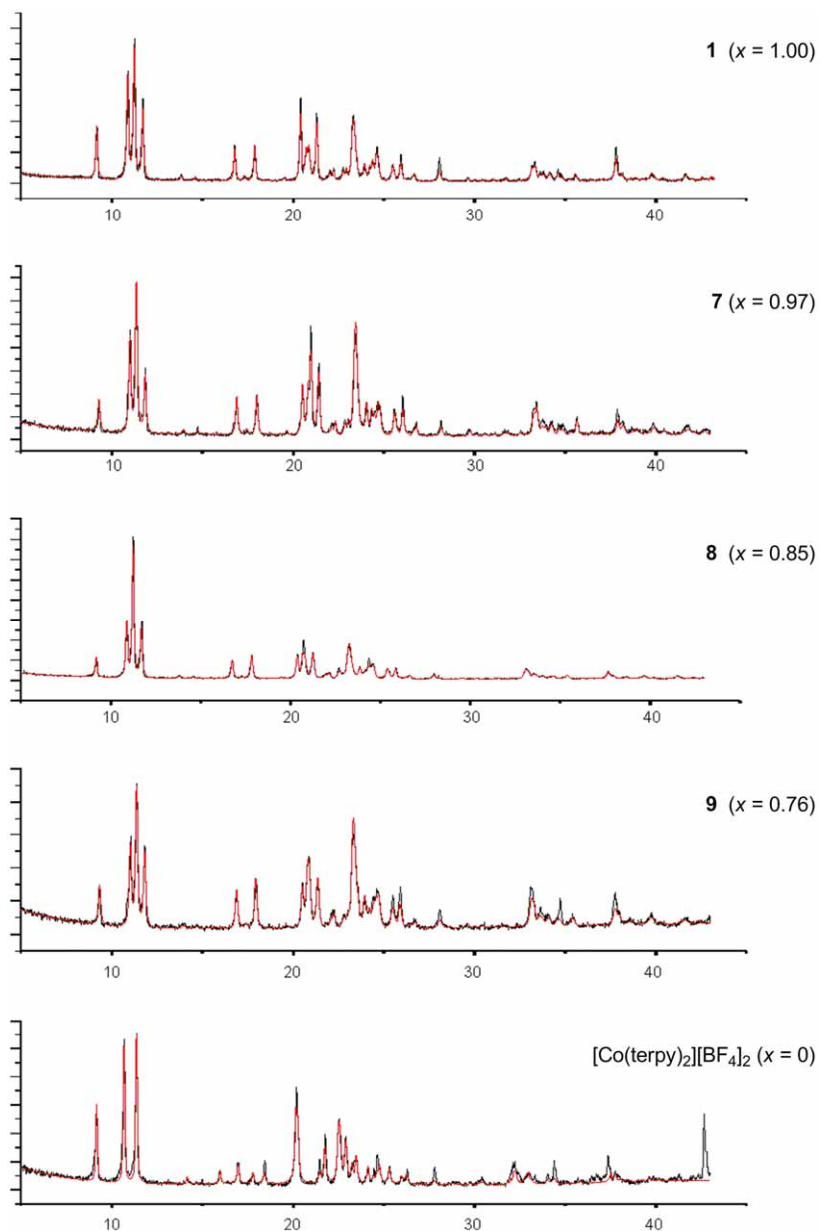

**Fig. S2** Observed (black) and simulated (red) powder X-ray diffraction patterns for [Fe(1-bpp)<sub>2</sub>]<sub>x</sub>[Co(terpy)<sub>2</sub>]<sub>1-x</sub>[BF<sub>4</sub>]<sub>2</sub> (**1** and **7-9**). The results of the simulations are given in Table S1.

**Table S1** Unit cell dimensions of  $[\text{Fe}(1\text{-bpp})_2]_x[\text{Ru}(\text{terpy})_2]_{1-x}[\text{BF}_4]_2$  (**2-6**) and the relevant precursor compounds  $[\text{Fe}(1\text{-bpp})_2][\text{BF}_4]_2$  ( $x = 1.00$ , **1**) and  $[\text{Ru}(\text{terpy})_2][\text{BF}_4]_2$  ( $x = 0$ ), from powder diffraction simulations (Fig. S1). The unit cell volumes calculated from these parameters are listed in Table 1 of the main paper.

|          | $x$  | Space group used in simulation | $a, \text{Å}$ | $b, \text{Å}$ | $c, \text{Å}$ | $\beta, ^\circ$ | $V, \text{Å}^3$ |
|----------|------|--------------------------------|---------------|---------------|---------------|-----------------|-----------------|
| <b>1</b> | 1.00 | $P2_1$                         | 8.49          | 8.51          | 19.05         | 95.6            | 1369.2          |
| <b>2</b> | 0.95 | $P2_1$                         | 8.51          | 8.53          | 19.07         | 95.6            | 1376.8          |
| <b>3</b> | 0.75 | $P2_1^a$                       | 8.58          | 8.59          | 19.14         | 95.5            | 1404.6          |
| <b>4</b> | 0.57 | $P2_1^a$                       | 8.62          | 8.63          | 19.14         | 95.5            | 1416.6          |
| <b>5</b> | 0.47 | $P2_1^a$                       | 8.67          | 8.66          | 19.16         | 95.4            | 1432.0          |
| <b>6</b> | 0.28 | $Cc$                           | 12.41         | 12.31         | 19.17         | 96.6            | 2910.3          |
|          | 0    | $Cc$                           | 12.61         | 12.39         | 19.18         | 98.0            | 2965.7          |

<sup>a</sup>These materials are predominantly in the  $P2_1$  space group, but also appear to contain a minor fraction of the  $Cc$  phase (Figs. S1 and S2). This contaminant could not be incorporated into the simulations.

**Table S2** Unit cell dimensions of  $[\text{Fe}(1\text{-bpp})_2]_x[\text{Co}(\text{terpy})_2]_{1-x}[\text{BF}_4]_2$  (**7-9**) and the relevant precursor compounds  $[\text{Fe}(1\text{-bpp})_2][\text{BF}_4]_2$  ( $x = 1.00$ , **1**) and  $[\text{Co}(\text{terpy})_2][\text{BF}_4]_2$  ( $x = 0$ ), from powder diffraction simulations (Fig. S2). The unit cell volumes calculated from these parameters are listed in Table 1 of the main paper.

|          | $x$  | Space group used in simulation | $a, \text{Å}$ | $b, \text{Å}$ | $c, \text{Å}$ | $\beta, ^\circ$ | $V, \text{Å}^3$ |
|----------|------|--------------------------------|---------------|---------------|---------------|-----------------|-----------------|
| <b>1</b> | 1.00 | $P2_1$                         | 8.49          | 8.51          | 19.05         | 95.6            | 1369.2          |
| <b>7</b> | 0.95 | $P2_1$                         | 8.50          | 8.52          | 19.06         | 95.6            | 1372.9          |
| <b>8</b> | 0.85 | $P2_1$                         | 8.53          | 8.55          | 19.14         | 95.5            | 1390.6          |
| <b>9</b> | 0.76 | $P2_1$                         | 8.57          | 8.57          | 19.17         | 95.4            | 1401.8          |
|          | 0    | $Cc$                           | 12.57         | 12.42         | 19.37         | 96.7            | 3000.7          |

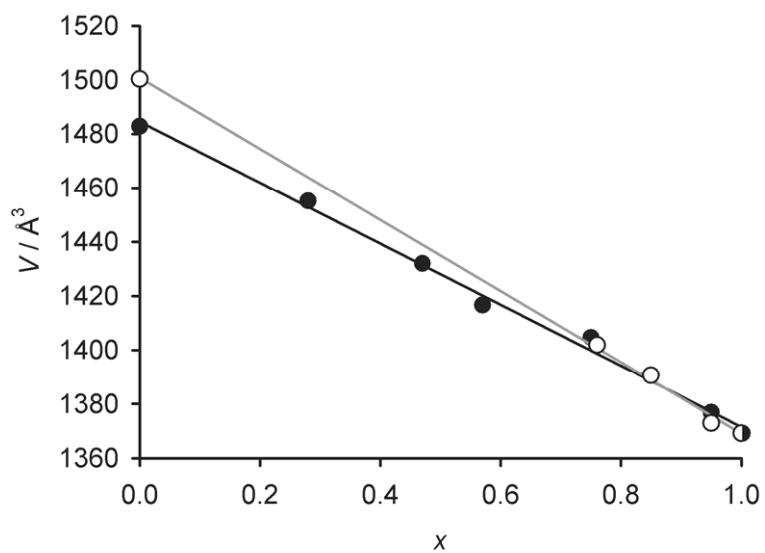

**Figure S3** Variation of the unit cell volume  $V$  with composition for  $[\text{Fe}(\text{1-bpp})_2]_x[\text{M}(\text{terpy})_2]_{1-x}[\text{BF}_4]_2$  for  $\text{M} = \text{Ru}$  (**1-6**; ●) and  $\text{M} = \text{Co}$  (**1** and **7-9**; ○). Lines of best fit are drawn through both sets of data. Volumes for the materials in the  $Cc$  phase are normalised to  $Z = 2$ .
